# Supplementary material
Source: publisher figshare collection journal article supplement (https://frontiersin.figshare.com/ndownloader/files/28320594)
Supplement: Supplementary file [file 28320594]

**Supplementary Table 1** Results of pairwise comparisons between demographic variables and rs2267735 (by ANOVA or  $\chi^2$  test).

| Demography SNP | Sex                                         | Age                                   | Education                                 | Marital                                   | Depress                              | Trauma Total                         |
|----------------|---------------------------------------------|---------------------------------------|-------------------------------------------|-------------------------------------------|--------------------------------------|--------------------------------------|
| rs2267735      | $\chi^2 = 8.149$ , $df = 2$ , $P = 0.017^*$ | $F_{(2,1129)} = 0.1115$ , $P = 0.891$ | $\chi^2 = 3.017$ , $df = 2$ , $P = 0.221$ | $\chi^2 = 1.198$ , $df = 2$ , $P = 0.549$ | $F_{(2,1129)} = 1.540$ , $P = 0.215$ | $F_{(2,1129)} = 0.625$ , $P = 0.535$ |

**Supplementary Table 2** Main effects of *ADCYAP1R1* (rs2267735) on PTSD severity.

| Sample  | Beta (95% CI)        | Std. Error | <i>t</i> value | <i>P</i> value | <i>P</i> <sub>perm</sub> | Cochran's <i>P</i> | <i>I</i> <sup>2</sup> | Effect size (semipartial correlation) |
|---------|----------------------|------------|----------------|----------------|--------------------------|--------------------|-----------------------|---------------------------------------|
| All     | -0.748 (-1.62, 0.12) | 0.444      | -1.684         | 0.092          | 0.09289                  | 0.213              | 35.4                  | -0.039                                |
| Females | -0.282 (-1.36, 0.80) | 0.551      | -0.511         | 0.609          | 0.61223                  |                    |                       | -0.014                                |
| Males   | -1.438 (-2.90, 0.03) | 0.748      | -1.923         | 0.055          | 0.0557                   |                    |                       | -0.078                                |

†*P*<sub>perm</sub>, permutation *P* value.

**Supplementary Table 3** The G×E effects of *ADCYAP1R1* (rs2267735×trauma exposure) on PTSD severity (single interaction model).

| Sample  | Beta (95% CI)        | Std. Error | <i>t</i> value | <i>P</i> value | <i>P</i> <sub>perm</sub> | Cochran's <i>P</i> | <i>I</i> <sup>2</sup> | Effect size (semipartial correlation) |
|---------|----------------------|------------|----------------|----------------|--------------------------|--------------------|-----------------------|---------------------------------------|
| All     | -0.152 (-0.63, 0.32) | 0.243      | -0.623         | 0.533          | 0.56148                  | 0.752              | 0                     | -0.014                                |
| Females | -0.048 (-0.65, 0.56) | 0.308      | -0.157         | 0.875          | 0.87949                  |                    |                       | -0.004                                |
| Males   | -0.208 (-0.99, 0.58) | 0.401      | -0.519         | 0.604          | 0.65328                  |                    |                       | -0.018                                |

†*P*<sub>perm</sub>, permutation *P* value.

**Supplementary Table 4** The G×E effects of *ADCYAP1R1* (rs2267735×trauma exposure) on PTSD severity (all-interaction model).

| Sample  | Beta (95% CI)        | Std. Error | <i>t</i> value | <i>P</i> value | <i>P</i> <sub>perm</sub> | Cochran's <i>P</i> | <i>I</i> <sup>2</sup> | Effect size (semipartial correlation) |
|---------|----------------------|------------|----------------|----------------|--------------------------|--------------------|-----------------------|---------------------------------------|
| All     | -0.119 (-0.62, 0.38) | 0.254      | -0.468         | 0.640          | 0.64971                  | 0.757              | 0                     | -0.011                                |
| Females | -0.032 (-0.65, 0.59) | 0.315      | -0.101         | 0.919          | 0.92138                  |                    |                       | -0.003                                |
| Males   | -0.200 (-1.07, 0.67) | 0.443      | -0.452         | 0.652          | 0.68978                  |                    |                       | -0.018                                |

†*P*<sub>perm</sub>, permutation *P* value.

**Supplementary Table 5** G×G effects of *ADCYAP1R1* – *CRHR2*(rs2267735 × rs8192496 and rs2267715) on PTSD severity.

| SNP       | Sample  | Beta (95% CI)          | Std.<br>Error | <i>t</i> value | <i>P</i> value | <i>P</i> <sub>perm</sub> | Cochran's<br><i>P</i> | <i>I</i> <sup>2</sup> | Effect size<br>(semipartial<br>correlation) | size |
|-----------|---------|------------------------|---------------|----------------|----------------|--------------------------|-----------------------|-----------------------|---------------------------------------------|------|
| rs8192496 | All     | 0.715 (-0.494, 1.924)  | 0.617         | 1.159          | 0.247          | 0.24732                  | 0.872                 | 0                     | 0.027                                       |      |
|           | Females | 0.666 (-0.845, 2.177)  | 0.771         | 0.864          | 0.388          | 0.38661                  |                       |                       | 0.024                                       |      |
|           | Males   | 0.458 (-1.567, 2.483)  | 1.033         | 0.443          | 0.658          | 0.6618                   |                       |                       | 0.018                                       |      |
| rs2267715 | All     | -0.002 (-1.219, 1.215) | 0.621         | -0.003         | 0.998          | 0.99671                  | 0.856                 | 0                     | 0.000                                       |      |
|           | Females | -0.168 (-1.654, 1.318) | 0.758         | -0.222         | 0.825          | 0.82912                  |                       |                       | -0.006                                      |      |
|           | Males   | 0.071 (-2.044, 2.186)  | 1.079         | 0.065          | 0.948          | 0.95672                  |                       |                       | 0.003                                       |      |

†*P*<sub>perm</sub>, permutation *P* value.
